# Supplementary material for: The Development of a Novel Fiber-2 Subunit Vaccine against Fowl Adenovirus Serotype 4 Formulated with Oil Adjuvants
Source: MDPI journal article supplement (doi:10.3390/vaccines12030263), 2024-03-01
Supplement: s1 [file s1]

**Figure S1**

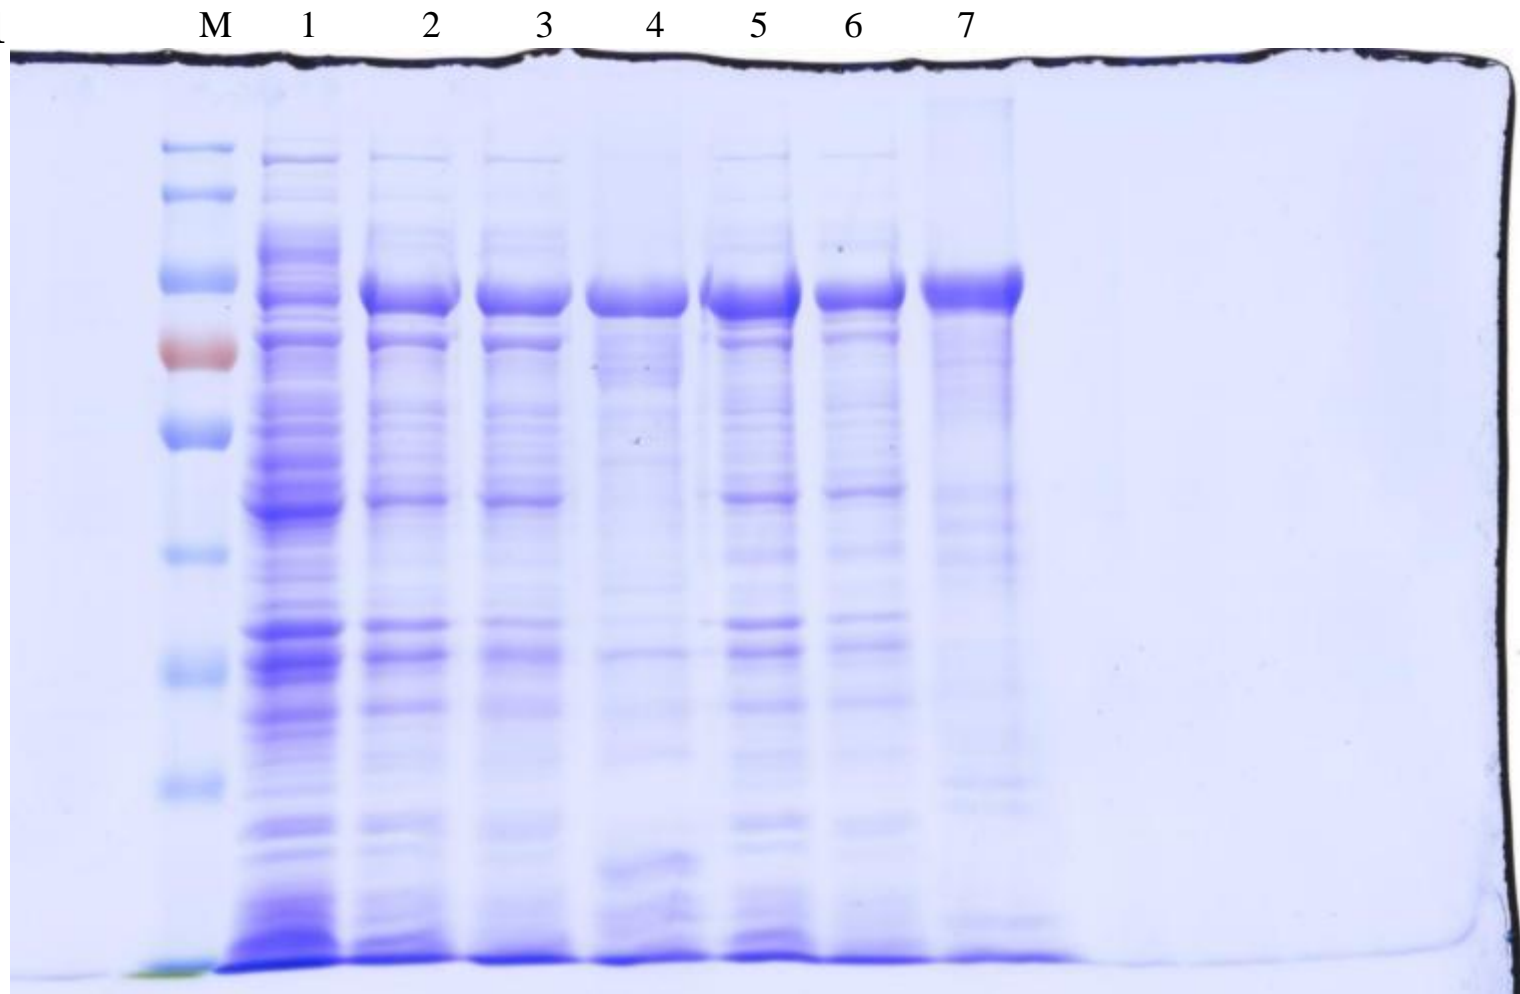

**SDS-PAGE analysis of soluble and pellet of *E. coli* expressing penton base and fiber-2 proteins**

M, protein ladder. Lane 1, *E. coli* Rosetta (DE3) containing pET-28a with IPTG induction. Lane 2, total extracts of *E. coli* Rosetta (DE3) containing pET-28a-fiber-2. Lane 3, soluble extracts of *E. coli* Rosetta (DE3) containing pET-28a-fiber-2. Lane 4 purified recombinant fiber-2 protein. Lane 5, total extracts of *E. coli* Rosetta (DE3) containing pET-28a-penton base. Lane 6, soluble extracts of *E. coli* Rosetta (DE3) containing pET-28a-penton base. Lane 7 purified recombinant penton base protein.

**Figure S2**

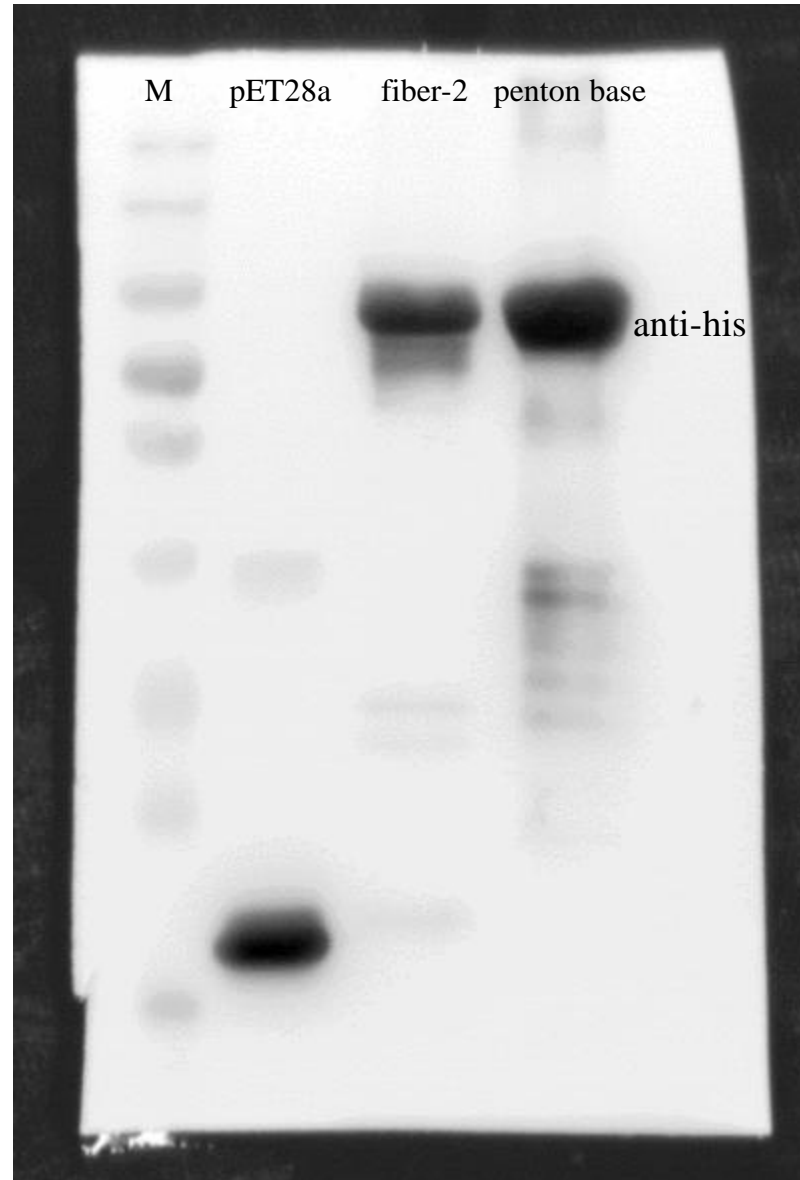

**Western blot analysis of the recombinant proteins probed by anti-histamine monoclonal antibody**  
M, protein ladder. Lane pET28a, E. coli Rosetta (DE3) containing pET-28a with IPTG induction. Lane fiber-2, purified recombinant fiber-2 protein. Lane penton base, purified recombinant penton base protein.

**Figure S3**

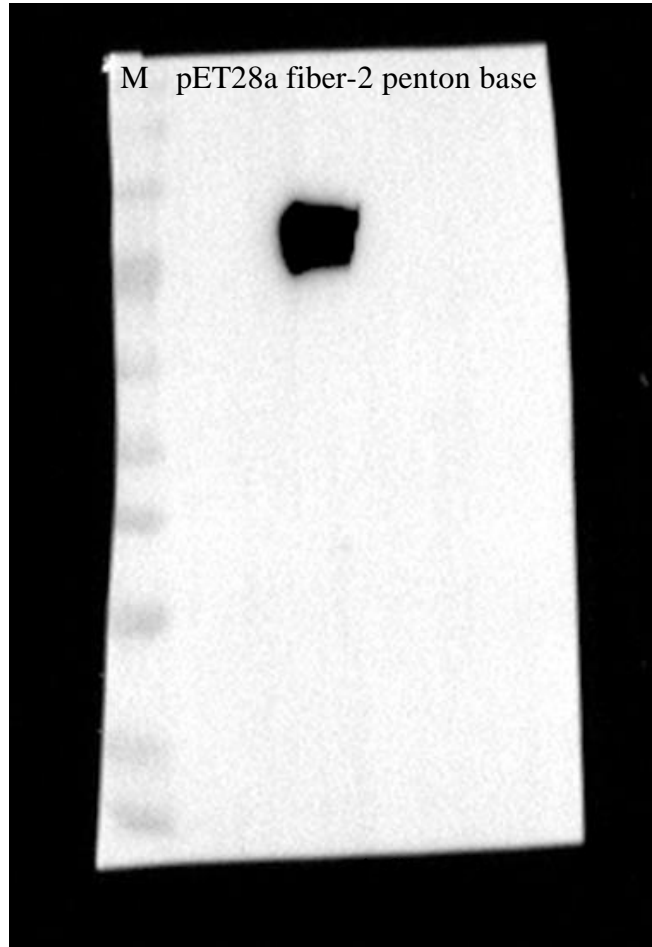

**Western blot analysis of the recombinant proteins probed by anti-Fiber-2 monoclonal antibody**  
M, protein ladder. Lane pET28a, E. coli Rosetta (DE3) containing pET-28a with IPTG induction. Lane fiber-2, purified recombinant fiber-2 protein. Lane penton base, purified recombinant penton base protein.

**Figure S4**

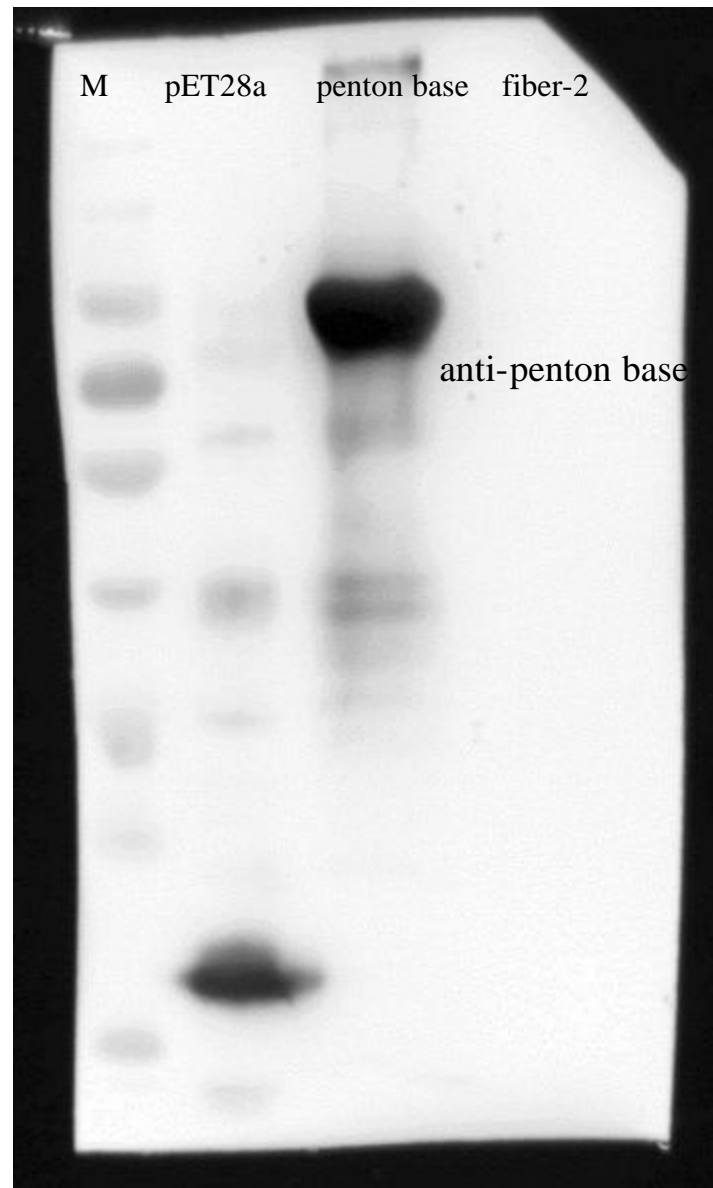

**Western blot analysis of the penton base protein probed by chicken polyclonal antibodies against anti-penton base positive chicken serum**  
M, protein ladder. Lane pET28a, E. coli Rosetta (DE3) containing pET-28a with IPTG induction. Lane fiber-2, purified recombinant fiber-2 protein. Lane penton base, purified recombinant penton base protein.
